# Supplementary material for: Radiolytic cyclization of stem-and-loop structured oligodeoxynucleotide with neighboring arrangement of α,ω-bis-disulfides
Source: Royal Society of Chemistry journal article supplement (doi:10.1039/c0ob00275e), 2010-01-01
Supplement: c0ob00275e.pdf [file c0ob00275e.pdf]

## Supporting Information

Radiolytic cyclization of stem-and-loop structured oligodeoxynucleotide with neighboring arrangement of  $\alpha,\omega$ -bis-disulfides

Kazuhito Tanabe,\* Eiji Matsumoto, Takeo Ito and Sei-ichi Nishimoto\*

Department of Energy and Hydrocarbon Chemistry, Graduate School of Engineering,

Kyoto University, Katsura Campus, Kyoto 615-8510, Japan

\*corresponding author

Phone: +81-75-383-2500 FAX: +81-75-383-2501

e-mail: tanabeka@scl.kyoto-u.ac.jp, nishimot@scl.kyoto-u.ac.jp

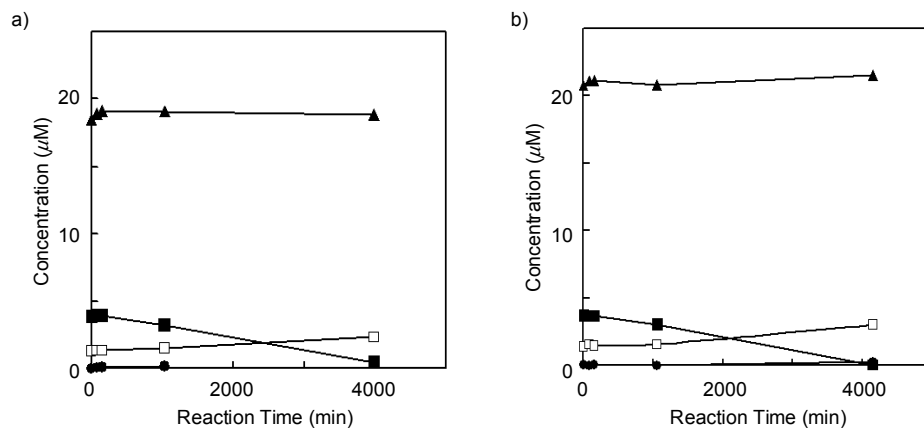

**Fig. S1** The reaction profile of ODN 1 in the presence of ODN 5. Ar-purged aqueous solution of (triangle) ODN 1 and (filled square) ODN 5 in a 10 mM phosphate buffer (a: pH 7.0, b: pH 8.7) containing 100 mM NaCl and 50 mM 2-methyl-2-propanol were incubated at ambient temperature. A slight amount of (open square) dimerized ODN 5 was formed during the reaction, while the formation of (circle) ODN C1 was negligible.

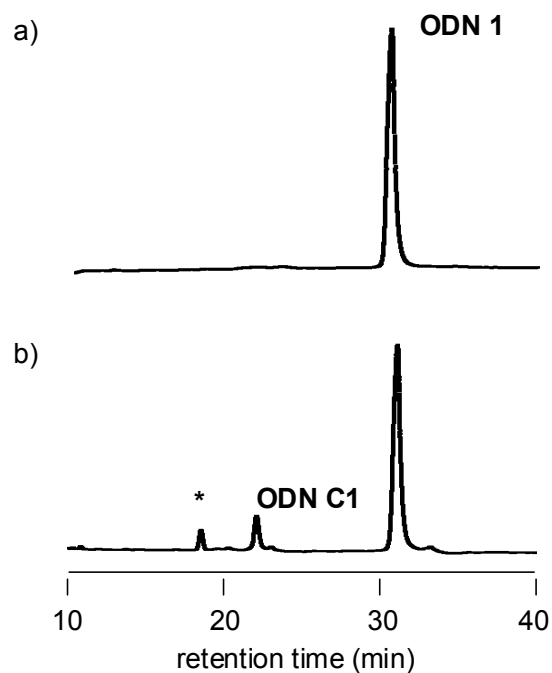

**Fig. S2** HPLC profiles of the photoreaction of ODN 1 (4.3  $\mu$ M) upon 254-nm irradiation in Ar-purged phosphate buffer solution (pH 7.0) containing 50 mM 2-methyl-2-propanol: (a) before photoreaction; (b) after photoirradiation for 9 h. The yield of ODN C1 was estimated to be 13%. The HPLC signal indicated with a symbol “\*” corresponds to a photodegradation product that could not be identified.

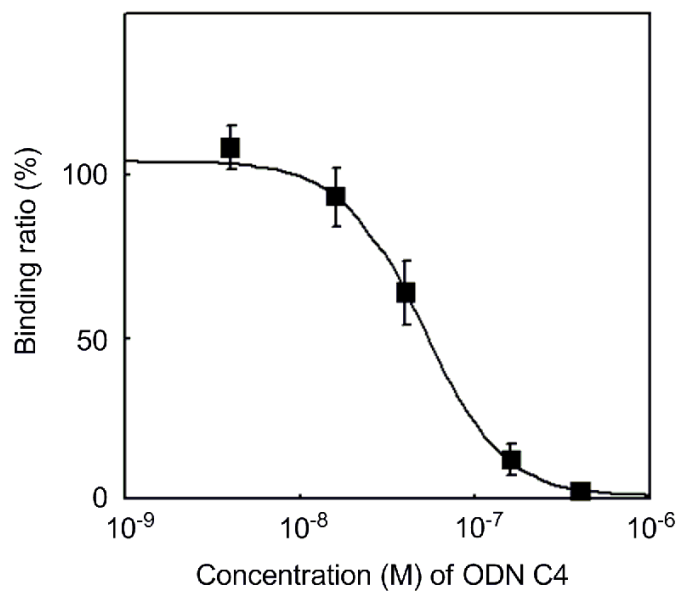

**Fig. S3** Competition curves of ODN C4 for binding of NF- $\kappa$ B and <sup>32</sup>P-labeled ODN 6/ODN 7 duplex. The IC<sub>50</sub> value for ODN C4 was estimated by plotting binding ratio of NF- $\kappa$ B and radiolabeled duplex as a concentration of ODN C4. The binding ratio at a given concentration of ODN C4 was calculated by three independent experiments.
